# Supplementary material
Source: PubMed Central journal article supplement (PMC4595595)
Supplement: ncomms9237-s1.pdf [file ncomms9237-s1.pdf]

**Supplementary Figure 1 RII $\beta$  re-expression in the hypothalamus reverses the prolonged leptin-induced pSTAT3 signaling.**

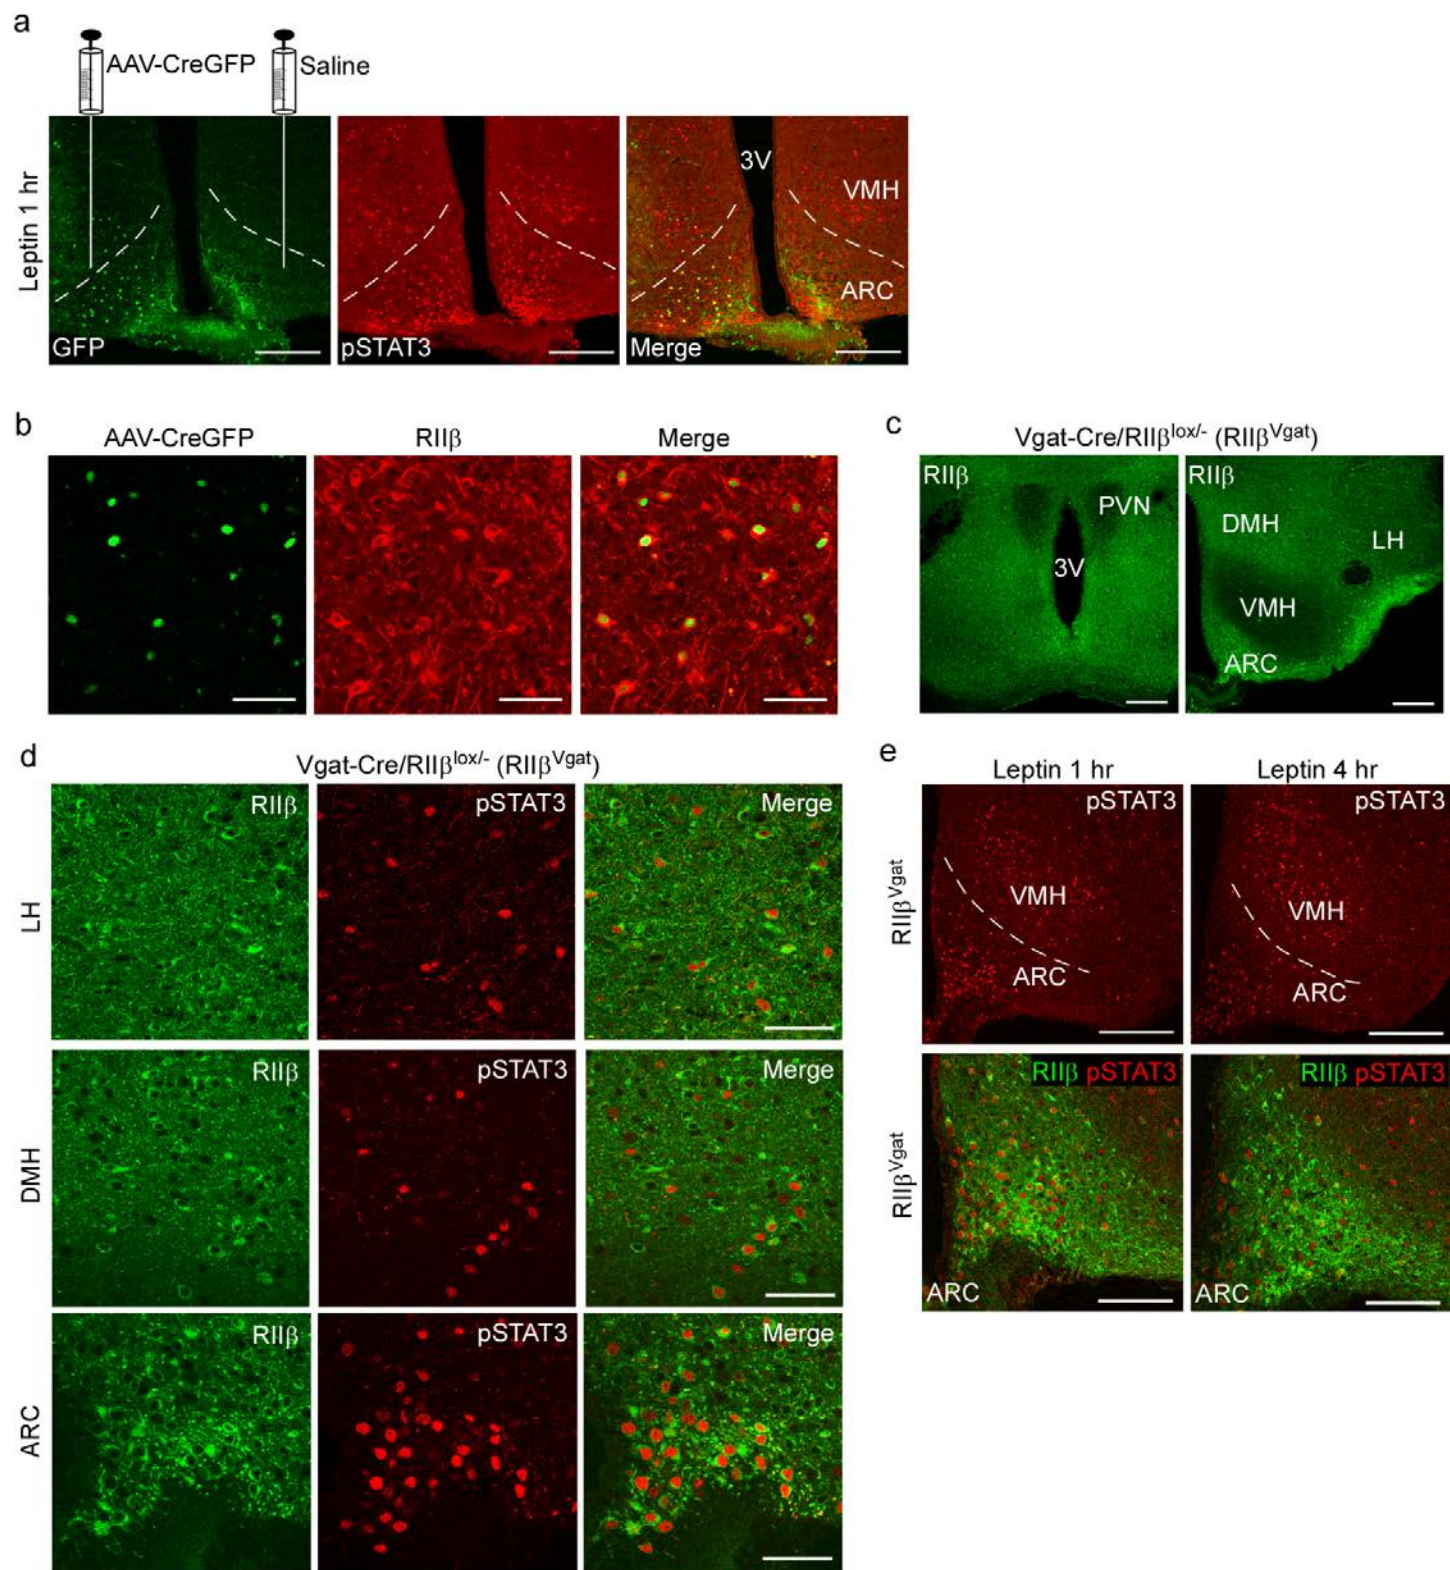

**Supplementary Figure 1 RII $\beta$  re-expression in the hypothalamus reverses the prolonged leptin-induced**

**pSTAT3 signaling.** (a) Representative images of CreGFP and pSTAT3 immunofluorescent staining in the ventral hypothalamus from RII $\beta^{lox/lox}$  mice (n = 3) injected with AAV1-CreGFP unilaterally and 1 h following leptin i.p. injection (1 mg/kg). Both CreGFP and pSTAT3 were localized to cell nucleus. Scale bars, 200  $\mu$ m. (b) Representative images of CreGFP fluorescence and RII $\beta$  immunofluorescent staining in the hypothalamus from RII $\beta^{lox/lox}$  mice with AAV1-CreGFP injection. CreGFP was localized in the nucleus while Cre-activated RII $\beta$  expression was localized in the soma and neuronal projections. Scale bars, 50  $\mu$ m. (c) Images of RII $\beta$  immunofluorescent staining in the hypothalamus from RII $\beta^{Vgat}$  mice. Scale bars, 200  $\mu$ m. (d) Representative images of RII $\beta$  and pSTAT3 immunofluorescent staining in the ARC, DMH and LH of 3 RII $\beta^{Vgat}$  mice 1 h following leptin i.p injection (1 mg/kg). Scale bars, 50  $\mu$ m. (e) Representative images of RII $\beta$  and pSTAT3 immunofluorescent staining in the ARC and VMH of RII $\beta^{Vgat}$  mice 1 h (n =3) and 4 h (n = 3) following leptin i.p. injection (1 mg/kg). Scale bars, 200  $\mu$ m (upper panels) and 100  $\mu$ m (lower panels). 3V, third ventricle; ARC, arcuate nucleus; VMH, ventromedial hypothalamic nucleus; LH, lateral hypothalamus.

**Supplementary Figure 2 PKA activity and CREB phosphorylation are impaired in the hypothalamus by RII $\beta$  disruption.**

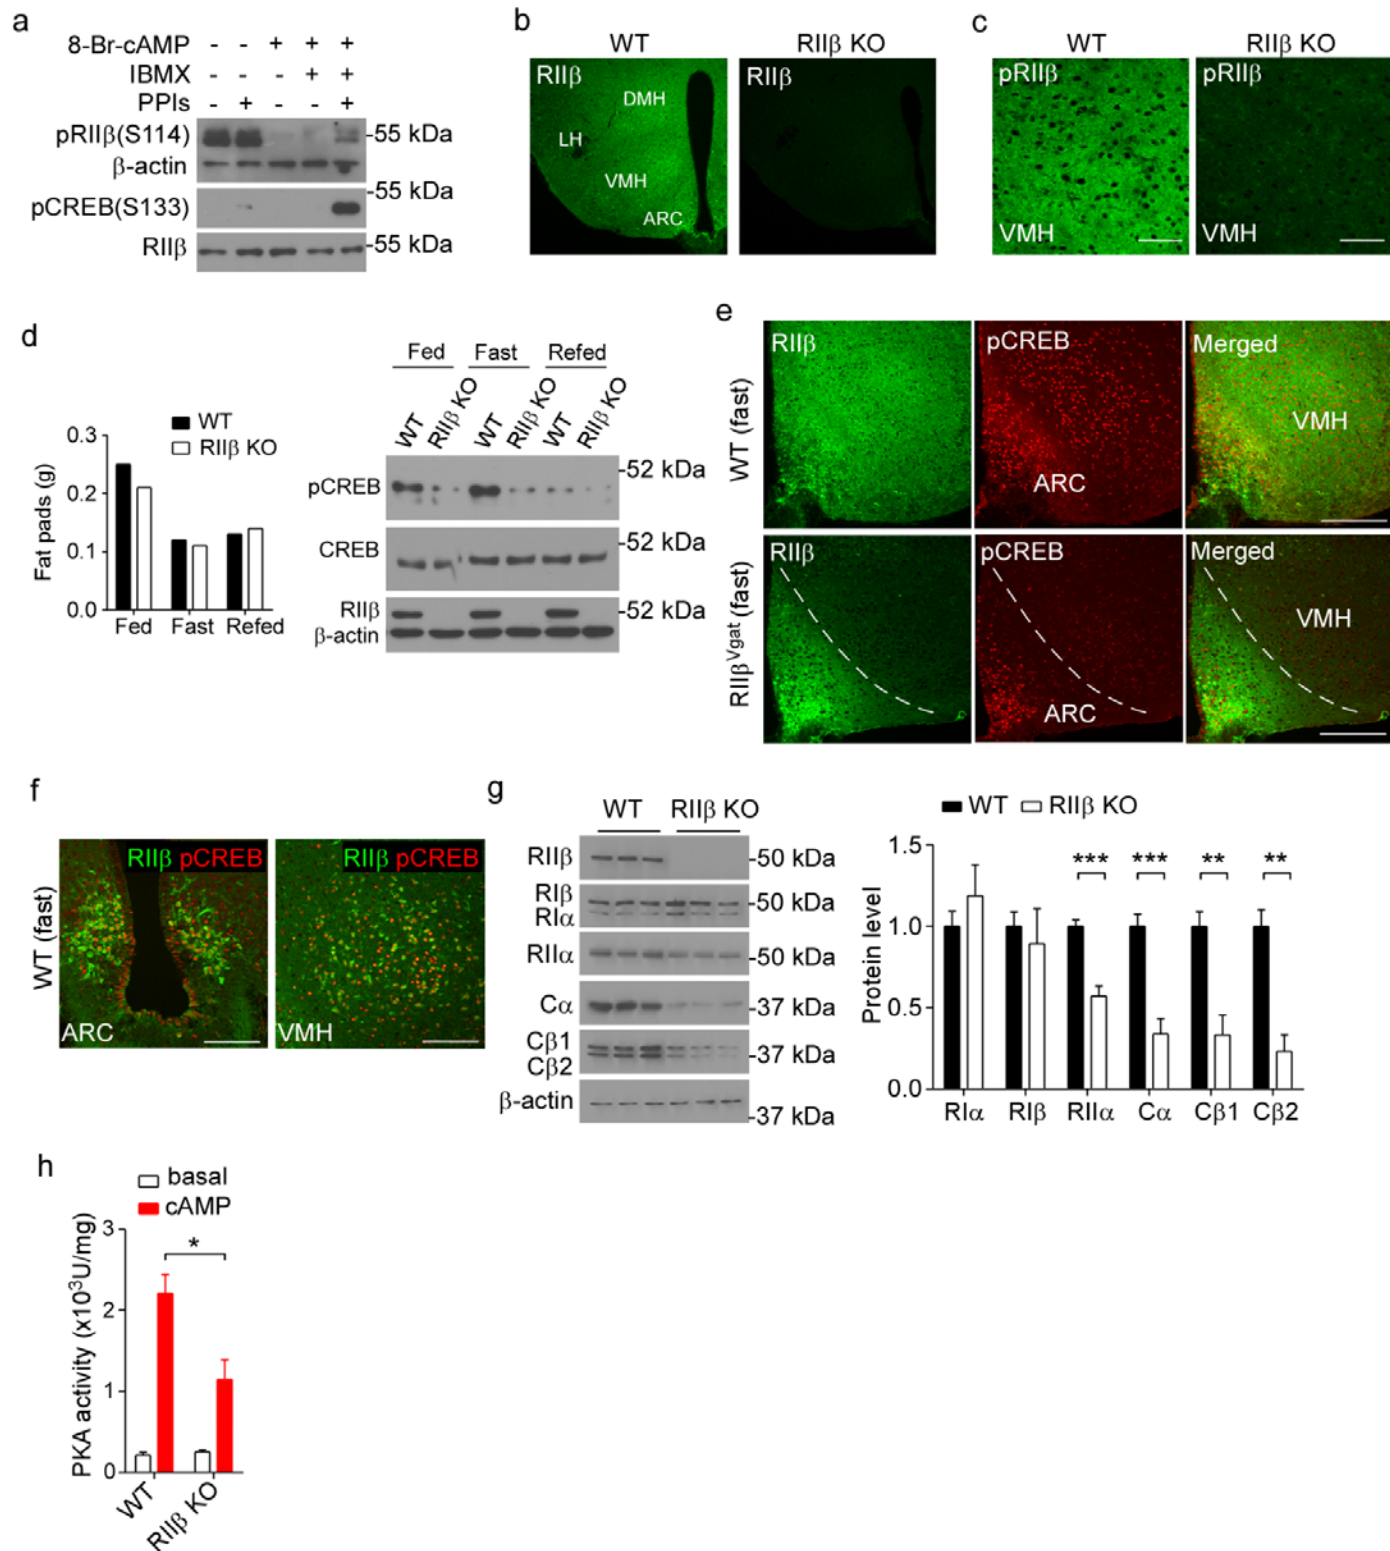

**Supplementary Figure 2 PKA activity and CREB phosphorylation are impaired in the hypothalamus by RII $\beta$  disruption.** (a) Western blots of pRII $\beta$  and pCREB in hypothalamic extracts incubated at 37°C for 5 min with or without cAMP analog 8-Br-cAMP (150  $\mu$ M) to activate PKA. Phosphodiesterase inhibitor IBMX (1mM) and 2 $\times$  phosphatase inhibitors (PPIs) (PhosSTOP, Roche) were added as indicated. (b,c) Representative images of immunofluorescent staining of RII $\beta$  (b) and pRII $\beta$  (c) in the hypothalamus of fasted WT (n = 3) and RII $\beta$  KO (n = 3) mice. Scale bars, 50  $\mu$ m. (d) Western blots of pCREB with hypothalamic samples from fat-matched WT (4 week old) and RII $\beta$  KO (6 week old) male mice fed ad libitum (fed), 24 h fast (fast), and 24 h fast followed by 2 h refeeding (refed). (e) Representative immunofluorescent staining of pCREB in the hypothalamus of WT (n = 3) and RII $\beta$ <sup>Vgat</sup> (n = 3) mice after 24 h fasting. Scale bars, 200  $\mu$ m. (f) Co-immunofluorescent staining of RII $\beta$  and pCREB in the hypothalamus of WT following a 24-h fast. Scale bars, 100  $\mu$ m. ARC, arcuate nucleus; VMH, ventromedial hypothalamic nucleus. (g) Representative Western blots (left) and quantification (right) of PKA subunits including RI $\alpha$ , RI $\beta$ , RII $\alpha$ , C $\alpha$ , C $\beta$ 1 and C $\beta$ 2 in the hypothalamus of WT and RII $\beta$  KO mice (n = 5 per group). Each lane of the blots represents a single mouse. (h) Basal and 5  $\mu$ M cAMP-stimulated PKA activity in the hypothalamic lysates from WT and RII $\beta$  KO mice (n = 3 per group). Full blots are shown in Supplementary Figure 3.

**Supplementary Figure 3** Full scans of Western blots.

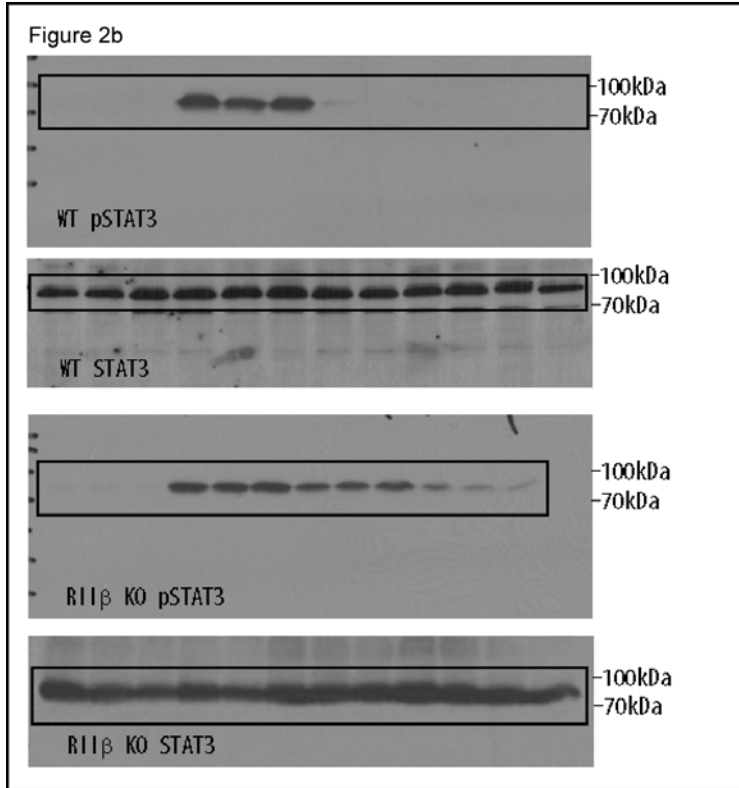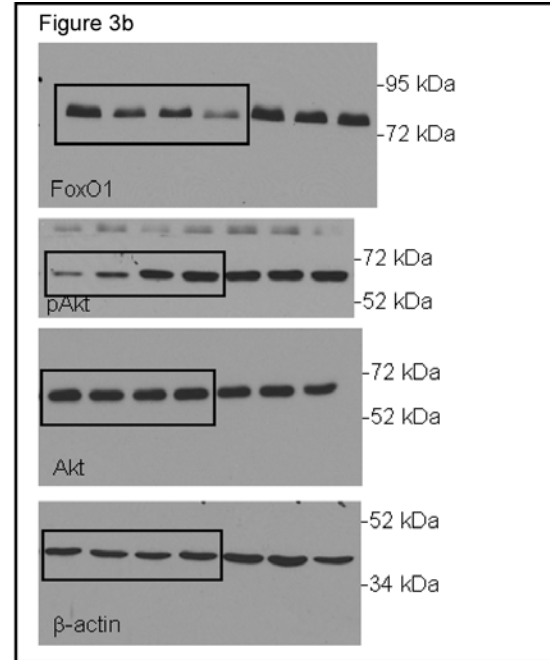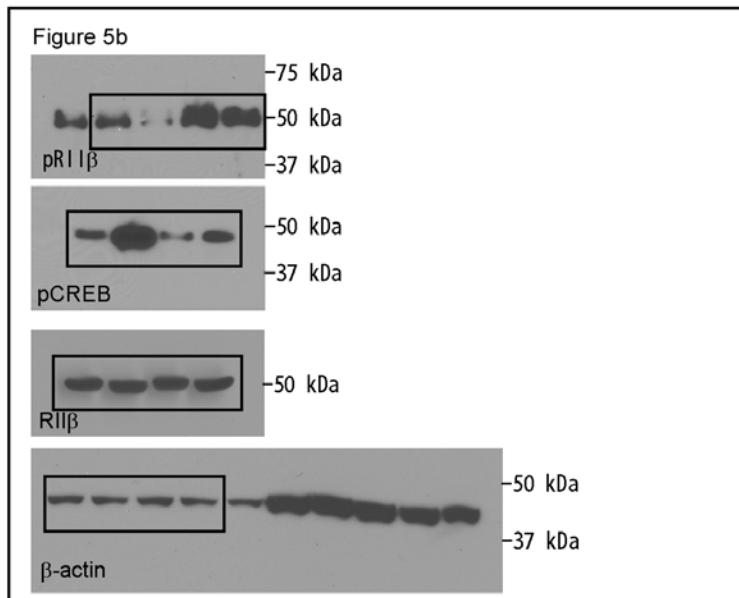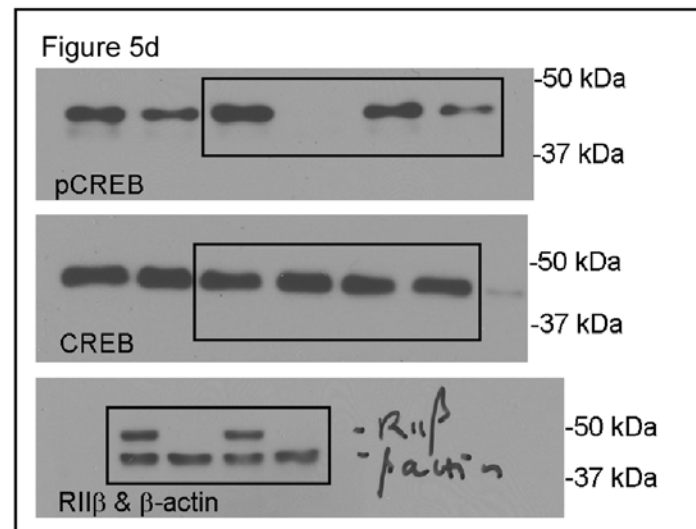

Supplementary Figure 2a

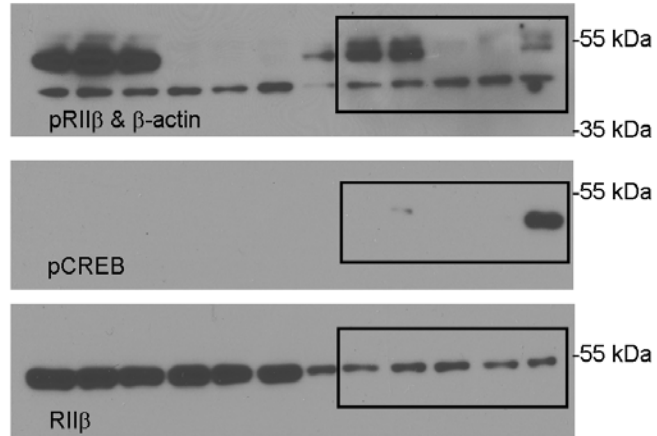

Supplementary Figure 2d

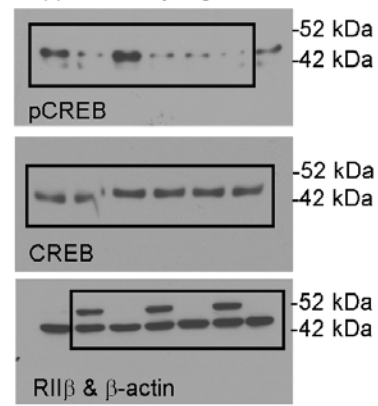

Supplementary Figure 2g

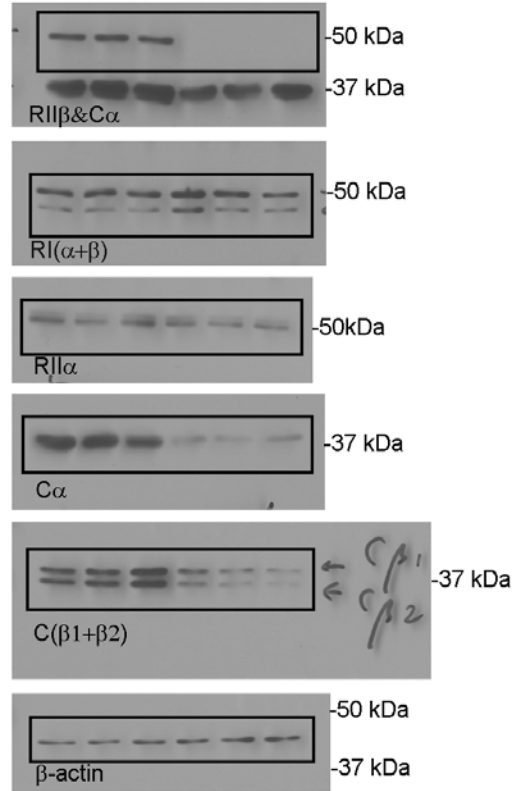

**Supplementary Table 1 DNA primers for quantitative RT-PCR.**

|                                 |                                                                                    |
|---------------------------------|------------------------------------------------------------------------------------|
| <i>LepRb</i>                    | Forward: 5'-TGTTTTGGGACGATGTTCCA-3'<br>Reverse: 5'-AAAGATGCTCAAATGTTTCAGGC-3'      |
| <i>Agrp</i>                     | Forward: 5'-TAGATCCACAGAACCGCGAGT-3'<br>Reverse: 5'-GAAGCGGCAGTAGCACGTA-3'         |
| <i>Npy</i>                      | Forward: 5'-CTCCGCTCTGCGACACTAC-3'<br>Reverse: 5'-AGGGTCTTCAAGCCTTGTTCT-3'         |
| <i>Pomc</i>                     | Forward: 5'-CTGGAGACGCCCGTGTTC-3'<br>Reverse: 5'-TGGACTCGGCTCTGGACTG -3'           |
| <i>Socs3</i>                    | Forward: 5'-GAGTACCCCAAGAGAGCTTACTA-3'<br>Reverse: 5'-CTCCTTAAAGTGGAGCATCATACTG-3' |
| <i>FoxO1</i>                    | Forward: 5'-CCCAGGCCGGAGTTTAACC-3'<br>Reverse: 5'-GTTGCTCATAAAGTCGGTGCT-3'         |
| <i><math>\beta</math>-actin</i> | Forward: 5'-AGTGTGACGTTGACATCCGTA-3'<br>Reverse: 5'-GCCAGAGCAGTAATCTCCTTCT-3'      |
| <i>Gapdh</i>                    | Forward: 5'-AGGTCGGTGTGAACGGATTTG-3'<br>Reverse: 5'-TGTAGACCATGTAGTTGAGGTCA-3'     |
